# Supplementary material
Source: Springer Nature journal article supplement (https://www.springermedizin.de/resource/supplementary/12876_2009_383_MOESM4_ESM.pdf/9439294)

Figure 3  
A

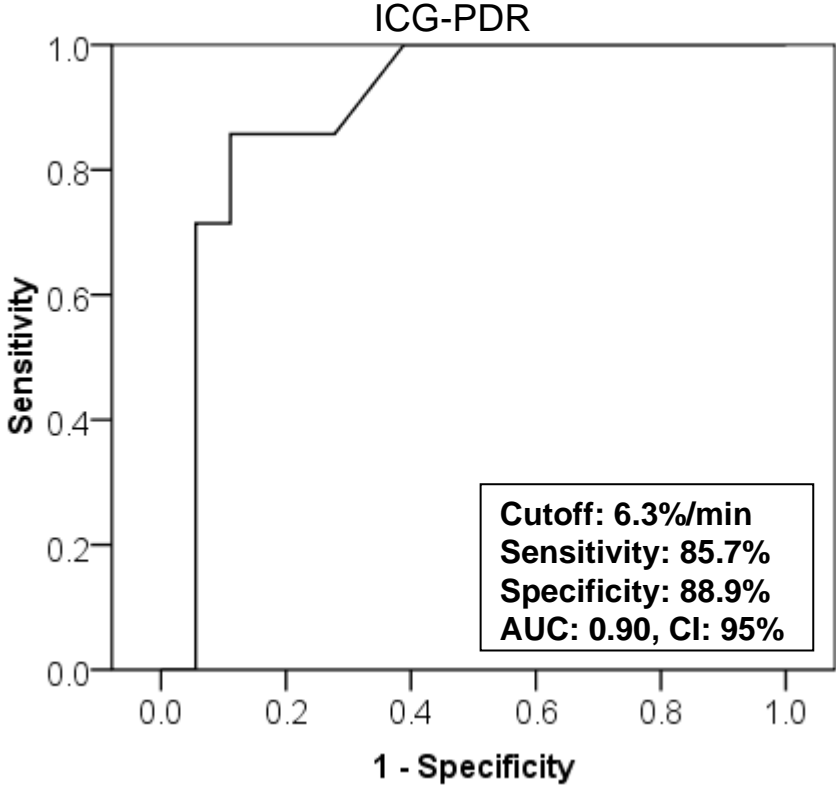

B

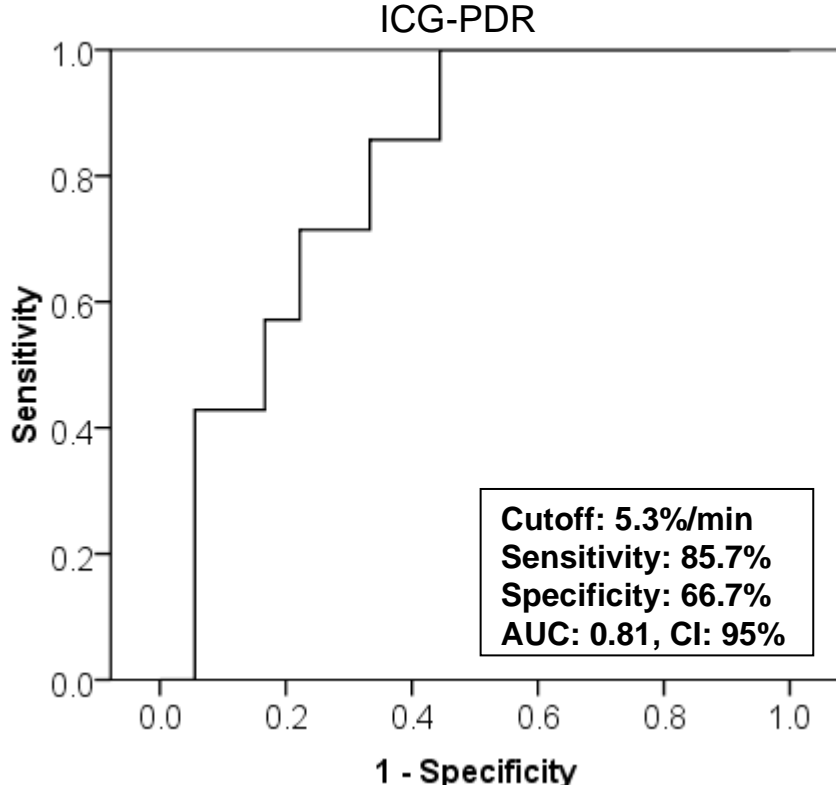

Supplement: MOESM4 [file 9439294]
